# Supplementary material for: Intermolecular interactions and solvation effects of dimethylsulfoxide on type III deep eutectic solvents
Source: Royal Society of Chemistry journal article supplement (doi:10.1039/c9cp02368b), 2019-01-01
Supplement: c9cp02368b1.pdf [file c9cp02368b1.pdf]

## Supplementary material

Shah et al: Intermolecular interactions and solvation effects of Dimethylsulfoxide on type III deep eutectic solvents

**Table S1:** LJ, partial charges, and bond parameters for urea, choline ion, and DMSO molecules. The atom numbers are mentioned in the figure above.  
All units are standard units used in gromacs.

### Urea

| Atom No. | Type     | Partial Charge | C6          | C12           |                |
|----------|----------|----------------|-------------|---------------|----------------|
| 1        | HC       | 0.426          | 8.46E-05    | 1.51E-08      |                |
| 2        | NT       | -0.981         | 0.00243641  | 5.06E-06      |                |
| 3        | HC       | 0.426          | 8.46E-05    | 1.51E-08      |                |
| 4        | C        | 0.915          | 0.002340624 | 4.94E-06      |                |
| 5        | O        | -0.657         | 0.002261954 | 1.00E-06      |                |
| 6        | NT       | -0.981         | 0.00243641  | 5.06E-06      |                |
| 7        | HC       | 0.426          | 8.46E-05    | 1.51E-08      |                |
| 8        | HC       | 0.426          | 8.46E-05    | 1.51E-08      |                |
| Bonds    |          |                |             |               |                |
| Atom No. | Atom No. | Function type  | Bond length | Bond constant |                |
| 1        | 2        | 2              | 0.101       | 2.11E+07      |                |
| 2        | 3        | 2              | 0.101       | 2.11E+07      |                |
| 2        | 4        | 2              | 0.138       | 1.10E+07      |                |
| 4        | 5        | 2              | 0.123       | 1.66E+07      |                |
| 4        | 6        | 2              | 0.138       | 1.10E+07      |                |
| 6        | 7        | 2              | 0.101       | 2.11E+07      |                |
| 6        | 8        | 2              | 0.101       | 2.11E+07      |                |
| Angles   |          |                |             |               |                |
| Atom No. | Atom No. | Atom No.       | Func.       | Angle         | Angle constant |
| 1        | 2        | 3              | 2           | 113           | 545            |
| 1        | 2        | 4              | 2           | 115           | 460            |
| 3        | 2        | 4              | 2           | 115           | 460            |
| 2        | 4        | 5              | 2           | 124           | 730            |
| 2        | 4        | 6              | 2           | 120           | 560            |

|                           |                 |                 |                 |              |              |           |             |
|---------------------------|-----------------|-----------------|-----------------|--------------|--------------|-----------|-------------|
| 5                         | 4               | 6               | 2               | 124          | 730          |           |             |
| 4                         | 6               | 7               | 2               | 115          | 460          |           |             |
| 4                         | 6               | 8               | 2               | 115          | 460          |           |             |
| 7                         | 6               | 8               | 2               | 113          | 545          |           |             |
| <b>Improper Dihedrals</b> |                 |                 |                 |              |              |           |             |
| <b>Atom No.</b>           | <b>Atom No.</b> | <b>Atom No.</b> | <b>Atom No.</b> | <b>Func.</b> | <b>Angle</b> | <b>Fc</b> |             |
| 4                         | 2               | 6               | 5               | 2            | 0            | 167.36    |             |
| <b>Proper Dihedrals</b>   |                 |                 |                 |              |              |           |             |
| <b>Atom No.</b>           | <b>Atom No.</b> | <b>Atom No.</b> | <b>Atom No.</b> | <b>Func.</b> | <b>Phi</b>   | <b>cp</b> | <b>Mult</b> |
| 1                         | 2               | 4               | 5               | 1            | 180          | 5.86      | 2           |
| 5                         | 4               | 6               | 8               | 1            | 180          | 5.86      | 2           |

### Choline ion

| Atom No. | Type     | Partial Charge | C6          | C12           |
|----------|----------|----------------|-------------|---------------|
| 1        | HS14     | 0.442          | 0           | 0             |
| 2        | OA       | -0.653         | 0.002261954 | 1.51E-06      |
| 3        | C        | 0.276          | 0.002340624 | 4.94E-06      |
| 4        | HC       | 0.029          | 8.46E-05    | 1.51E-08      |
| 5        | HC       | 0.029          | 8.46E-05    | 1.51E-08      |
| 6        | C        | -0.224         | 0.002340624 | 4.94E-06      |
| 7        | HC       | 0.151          | 8.46E-05    | 1.51E-08      |
| 8        | HC       | 0.151          | 8.46E-05    | 1.51E-08      |
| 9        | NL       | 0.346          | 0.00243641  | 2.32E-06      |
| 10       | C        | -0.452         | 0.002340624 | 4.94E-06      |
| 11       | HC       | 0.201          | 8.46E-05    | 1.51E-08      |
| 12       | HC       | 0.201          | 8.46E-05    | 1.51E-08      |
| 13       | HC       | 0.201          | 8.46E-05    | 1.51E-08      |
| 14       | C        | -0.452         | 0.002340624 | 4.94E-06      |
| 15       | HC       | 0.201          | 8.46E-05    | 1.51E-08      |
| 16       | HC       | 0.201          | 8.46E-05    | 1.51E-08      |
| 17       | HC       | 0.201          | 8.46E-05    | 1.51E-08      |
| 18       | C        | -0.452         | 0.002340624 | 4.94E-06      |
| 19       | HC       | 0.201          | 8.46E-05    | 1.51E-08      |
| 20       | HC       | 0.201          | 8.46E-05    | 1.51E-08      |
| 21       | HC       | 0.201          | 8.46E-05    | 1.51E-08      |
| Bonds    |          |                |             |               |
| Atom No. | Atom No. | Function type  | Bond length | Bond constant |
| 1        | 2        | 2              | 0.0972      | 1.96E+07      |
| 2        | 3        | 2              | 0.142       | 3.22E+06      |
| 3        | 4        | 2              | 0.109       | 1.23E+07      |
| 3        | 5        | 2              | 0.109       | 1.23E+07      |
| 3        | 6        | 2              | 0.152       | 5.43E+06      |
| 6        | 7        | 2              | 0.109       | 1.23E+07      |
| 6        | 8        | 2              | 0.109       | 1.23E+07      |
| 6        | 9        | 2              | 0.153       | 7.15E+06      |
| 9        | 10       | 2              | 0.151       | 3.73E+06      |

|                 |                 |                 |              |              |                       |
|-----------------|-----------------|-----------------|--------------|--------------|-----------------------|
| 9               | 14              | 2               | 0.151        | 3.73E+06     |                       |
| 9               | 18              | 2               | 0.151        | 3.73E+06     |                       |
| 10              | 11              | 2               | 0.109        | 1.23E+07     |                       |
| 10              | 12              | 2               | 0.109        | 1.23E+07     |                       |
| 10              | 13              | 2               | 0.109        | 1.23E+07     |                       |
| 14              | 15              | 2               | 0.109        | 1.23E+07     |                       |
| 14              | 16              | 2               | 0.109        | 1.23E+07     |                       |
| 14              | 17              | 2               | 0.109        | 1.23E+07     |                       |
| 18              | 19              | 2               | 0.109        | 1.23E+07     |                       |
| 18              | 20              | 2               | 0.109        | 1.23E+07     |                       |
| 18              | 21              | 2               | 0.109        | 1.23E+07     |                       |
| <b>Angles</b>   |                 |                 |              |              |                       |
| <b>Atom No.</b> | <b>Atom No.</b> | <b>Atom No.</b> | <b>Func.</b> | <b>Angle</b> | <b>Angle constant</b> |
| 1               | 2               | 3               | 2            | 109.5        | 450                   |
| 2               | 3               | 4               | 2            | 111.4        | 532                   |
| 2               | 3               | 5               | 2            | 111.4        | 532                   |
| 2               | 3               | 6               | 2            | 109.5        | 520                   |
| 4               | 3               | 5               | 2            | 106.75       | 503                   |
| 4               | 3               | 6               | 2            | 111.4        | 532                   |
| 5               | 3               | 6               | 2            | 111.4        | 532                   |
| 3               | 6               | 7               | 2            | 110.3        | 524                   |
| 3               | 6               | 8               | 2            | 110.3        | 524                   |
| 3               | 6               | 9               | 2            | 115          | 610                   |
| 7               | 6               | 8               | 2            | 108.53       | 443                   |
| 7               | 6               | 9               | 2            | 106          | 1733.55               |
| 8               | 6               | 9               | 2            | 106          | 1733.55               |
| 6               | 9               | 10              | 2            | 116          | 620                   |
| 6               | 9               | 14              | 2            | 116          | 620                   |
| 6               | 9               | 18              | 2            | 116          | 620                   |
| 10              | 9               | 14              | 2            | 109          | 1680.51               |
| 10              | 9               | 18              | 2            | 109          | 1680.51               |
| 14              | 9               | 18              | 2            | 109          | 1680.51               |
| 9               | 10              | 11              | 2            | 108.53       | 443                   |
| 9               | 10              | 12              | 2            | 108.53       | 443                   |
| 9               | 10              | 13              | 2            | 108.53       | 443                   |

|    |    |    |   |        |     |
|----|----|----|---|--------|-----|
| 11 | 10 | 12 | 2 | 111.3  | 632 |
| 11 | 10 | 13 | 2 | 111.3  | 632 |
| 12 | 10 | 13 | 2 | 111.3  | 632 |
| 9  | 14 | 15 | 2 | 108.53 | 443 |
| 9  | 14 | 16 | 2 | 108.53 | 443 |
| 9  | 14 | 17 | 2 | 108.53 | 443 |
| 15 | 14 | 16 | 2 | 111.3  | 632 |
| 15 | 14 | 17 | 2 | 111.3  | 632 |
| 16 | 14 | 17 | 2 | 111.3  | 632 |
| 9  | 18 | 19 | 2 | 108.53 | 443 |
| 9  | 18 | 20 | 2 | 108.53 | 443 |
| 9  | 18 | 21 | 2 | 108.53 | 443 |
| 19 | 18 | 20 | 2 | 111.3  | 632 |
| 19 | 18 | 21 | 2 | 111.3  | 632 |
| 20 | 18 | 21 | 2 | 111.3  | 632 |

**Proper Dihedrals**

| Atom No. | Atom No. | Atom No. | Atom No. | Func. | Phi | cp   | Mult |
|----------|----------|----------|----------|-------|-----|------|------|
| 1        | 2        | 3        | 6        | 1     | 0   | 1.26 | 3    |
| 2        | 3        | 6        | 9        | 1     | 0   | 5.92 | 3    |
| 3        | 6        | 9        | 18       | 1     | 0   | 1.05 | 3    |
| 6        | 9        | 10       | 11       | 1     | 0   | 1.05 | 3    |
| 6        | 9        | 14       | 15       | 1     | 0   | 1.05 | 3    |
| 6        | 9        | 18       | 19       | 1     | 0   | 1.05 | 3    |

**DMSO**

| Atom No. | Type | Partial Charge | C6       | C12      |
|----------|------|----------------|----------|----------|
| 1        | HDM  | 0.09           | 7.44E-05 | 1.38E-08 |
| 2        | CDM  | -0.148         | 0.003011 | 6.94E-06 |
| 3        | HDM  | 0.09           | 7.44E-05 | 1.38E-08 |
| 4        | HDM  | 0.09           | 7.44E-05 | 1.38E-08 |
| 5        | SDM  | 0.312          | 0.011996 | 2.46E-05 |
| 6        | ODM  | -0.556         | 0.001551 | 1.20E-06 |
| 7        | CDM  | -0.148         | 0.003011 | 6.94E-06 |
| 8        | HDM  | 0.09           | 7.44E-05 | 1.38E-08 |

|                         |                 |                      |                    |                      |                       |           |             |
|-------------------------|-----------------|----------------------|--------------------|----------------------|-----------------------|-----------|-------------|
| 9                       | HDM             | 0.09                 | 7.44E-05           | 1.38E-08             |                       |           |             |
| 10                      | HDM             | 0.09                 | 7.44E-05           | 1.38E-08             |                       |           |             |
| <b>Bonds</b>            |                 |                      |                    |                      |                       |           |             |
| <b>Atom No.</b>         | <b>Atom No.</b> | <b>Function type</b> | <b>Bond length</b> | <b>Bond constant</b> |                       |           |             |
| 1                       | 2               | 1                    | 0.111              | 1.35E+05             |                       |           |             |
| 2                       | 3               | 1                    | 0.111              | 1.35E+05             |                       |           |             |
| 2                       | 4               | 1                    | 0.111              | 1.35E+05             |                       |           |             |
| 2                       | 5               | 1                    | 0.18               | 1.00E+05             |                       |           |             |
| 5                       | 6               | 1                    | 0.153              | 2.26E+05             |                       |           |             |
| 5                       | 7               | 1                    | 0.18               | 1.00E+05             |                       |           |             |
| 7                       | 8               | 1                    | 0.111              | 1.35E+05             |                       |           |             |
| 7                       | 9               | 1                    | 0.111              | 1.35E+05             |                       |           |             |
| 7                       | 10              | 1                    | 0.111              | 1.35E+05             |                       |           |             |
| <b>Angles</b>           |                 |                      |                    |                      |                       |           |             |
| <b>Atom No.</b>         | <b>Atom No.</b> | <b>Atom No.</b>      | <b>Func.</b>       | <b>Angle</b>         | <b>Angle constant</b> |           |             |
| 1                       | 2               | 3                    | 1                  | 108.4                | 148.53                |           |             |
| 1                       | 2               | 4                    | 1                  | 108.4                | 148.53                |           |             |
| 1                       | 2               | 5                    | 1                  | 111.3                | 192.88                |           |             |
| 3                       | 2               | 4                    | 1                  | 108.4                | 148.53                |           |             |
| 3                       | 2               | 5                    | 1                  | 111.3                | 192.88                |           |             |
| 4                       | 2               | 5                    | 1                  | 111.3                | 192.88                |           |             |
| 2                       | 5               | 6                    | 1                  | 106.75               | 330.54                |           |             |
| 2                       | 5               | 7                    | 1                  | 95                   | 142.26                |           |             |
| 6                       | 5               | 7                    | 1                  | 106.75               | 330.54                |           |             |
| 5                       | 7               | 8                    | 1                  | 111.3                | 192.88                |           |             |
| 5                       | 7               | 9                    | 1                  | 111.3                | 192.88                |           |             |
| 5                       | 7               | 10                   | 1                  | 111.3                | 192.88                |           |             |
| 8                       | 7               | 9                    | 1                  | 108.4                | 148.53                |           |             |
| 8                       | 7               | 10                   | 1                  | 108.4                | 148.53                |           |             |
| 9                       | 7               | 10                   | 1                  | 108.4                | 148.53                |           |             |
| <b>Proper Dihedrals</b> |                 |                      |                    |                      |                       |           |             |
| <b>Atom No.</b>         | <b>Atom No.</b> | <b>Atom No.</b>      | <b>Atom No.</b>    | <b>Func.</b>         | <b>Phi</b>            | <b>cp</b> | <b>Mult</b> |
| 3                       | 2               | 5                    | 6                  | 1                    | 0                     | 0.84      | 3           |
| 2                       | 5               | 7                    | 8                  | 1                    | 0                     | 0.84      | 3           |

**Table S2.** The number of H-bonds between the components according to DMSO and DES concentration.

| Components           | Urea-Urea | Urea-CHT | Urea-CL | Urea-DMSO | CHT-CL | CHT-DMSO | CL-DMSO | CL-CL | CHT-CHT |
|----------------------|-----------|----------|---------|-----------|--------|----------|---------|-------|---------|
| Pure DES             | 158.97    | 150.19   | 19.48   |           | 194.90 |          |         | 0.00  | 16.09   |
| 0.95 DES - 0.05 DMSO | 170.51    | 165.47   | 15.97   | 7.27      | 181.40 | 3.12     | 0.00    | 0.00  | 23.51   |
| 0.9 DES - 0.1 DMSO   | 176.56    | 155.99   | 15.17   | 13.77     | 189.85 | 4.51     | 0.00    | 0.00  | 18.48   |
| 0.7 DES - 0.3 DMSO   | 165.91    | 147.18   | 14.24   | 44.00     | 191.51 | 17.28    | 0.01    | 0.00  | 17.39   |
| 0.5 DES - 0.5 DMSO   | 141.68    | 136.35   | 14.63   | 75.32     | 179.45 | 33.85    | 0.02    | 0.00  | 20.69   |
| 0.3 DES - 0.7 DMSO   | 117.83    | 120.63   | 13.23   | 129.70    | 190.89 | 61.90    | 0.02    | 0.00  | 14.71   |
| 0.1 DES - 0.9 DMSO   | 71.35     | 79.98    | 11.13   | 256.09    | 167.67 | 144.43   | 0.04    | 0.00  | 9.41    |
| Pure DMSO            |           |          |         |           |        |          |         |       |         |

**Table S3.** Diffusion coefficients of the molecules in reline-water mixture. All units are in  $\text{cm}^2/\text{s}$ .

| Components | Water mole fraction   |                       |                       |                       |                       |                       |                       |
|------------|-----------------------|-----------------------|-----------------------|-----------------------|-----------------------|-----------------------|-----------------------|
|            | 0.0 (Pure reline)     | 0.1                   | 0.3                   | 0.5                   | 0.7                   | 0.9                   | 1.0 (Pure water)      |
| Urea       | $4.37 \times 10^{-8}$ | $5.26 \times 10^{-8}$ | $9.96 \times 10^{-8}$ | $1.00 \times 10^{-7}$ | $2.91 \times 10^{-7}$ | $2.05 \times 10^{-6}$ |                       |
| Choline    | $3.34 \times 10^{-8}$ | $4.16 \times 10^{-8}$ | $5.59 \times 10^{-8}$ | $7.11 \times 10^{-8}$ | $1.64 \times 10^{-7}$ | $1.17 \times 10^{-6}$ |                       |
| Chloride   | $2.28 \times 10^{-8}$ | $2.40 \times 10^{-8}$ | $6.20 \times 10^{-8}$ | $6.94 \times 10^{-8}$ | $2.03 \times 10^{-7}$ | $1.83 \times 10^{-6}$ |                       |
| Water      |                       | $5.90 \times 10^{-8}$ | $1.32 \times 10^{-7}$ | $1.71 \times 10^{-7}$ | $4.14 \times 10^{-7}$ | $3.56 \times 10^{-6}$ | $2.53 \times 10^{-5}$ |
| System     | $3.67 \times 10^{-8}$ | $4.44 \times 10^{-8}$ | $7.85 \times 10^{-8}$ | $9.01 \times 10^{-8}$ | $2.54 \times 10^{-7}$ | $2.40 \times 10^{-6}$ |                       |
